# Supplementary material for: Comparative chloroplast genome analyses of diverse Phoebe (Lauraceae) species endemic to China provide insight into their phylogeographical origin
Source: PeerJ. 2023 Feb 3;11:e14573. doi: 10.7717/peerj.14573 (PMC9901306; doi:10.7717/peerj.14573)
Supplement: Supplemental Information 1 [file peerj-11-14573-s001.xlsx]

## Sheet: Sheet1
Species	GenBank accession numbers	Genus	Family	Geographical distributions
Phoebe hunanensis	MZ442606	Phoebe	Lauraceae	Hunan, Hubei, Jiangxi and Anhui, China
Phoebe tavoyana	MZ442607	Phoebe	Lauraceae	Yunnan, Hainan and Guangdong, China
Phoebe sp. Wh051	MZ433416	Phoebe	Lauraceae	Hunan and Hubei, China
Phoebe formosana	MZ433407	Phoebe	Lauraceae	Taiwan and Anhui, China
Phoebe neuranthoides	MZ433414	Phoebe	Lauraceae	Hunan, Hubei, Guizhou, Sichuan and Chongqing, China
Phoebe bournei	NC_034926	Phoebe	Lauraceae	Fujian, Hubei, Guizhou and Jiangxi, China
Phoebe zhennan	NC_036143	Phoebe	Lauraceae	Hubei, Guizhou, Sichuan and Chongqing, China
Phoebe chekiangensis	NC_034925	Phoebe	Lauraceae	Zhejiang, Fujian and Jiangxi, China
Phoebe sheareri	NC_031191	Phoebe	Lauraceae	Zhejiang, Fujian, Hubei and Jiangxi, China
Phoebe puwenensis	NC_050171	Phoebe	Lauraceae	Yunnan, China
Phoebe yunnanensis	MT621606	Phoebe	Lauraceae	Yunnan, China
Phoebe omeiensis	NC_031190	Phoebe	Lauraceae	Yunnan, Guizhou and Hubei, China
Phoebe calcarea	MZ433404	Phoebe	Lauraceae	Guizhou, China
Phoebe crassipedicella	MZ433406	Phoebe	Lauraceae	Guizhou, China
Phoebe hui	MT621612	Phoebe	Lauraceae	Yunnan and Sichuan, China
Phoebe cavaleriei	MT621644	Phoebe	Lauraceae	Yunnan, Guizhou, Sichuan and Chongqing, China
Phoebe neurantha	NC_039620	Phoebe	Lauraceae	Yunnan, Guizhou, Sichuan and Chongqing, China
Phoebe sp. ZF55	MT621643	Phoebe	Lauraceae	Yunnan, China
Phoebe lanceolata	MZ433411	Phoebe	Lauraceae	Yunnan, China
Phoebe glaucophylla	MZ433408	Phoebe	Lauraceae	Yunnan, China
Phoebe macrocarpa	MZ433412	Phoebe	Lauraceae	Yunnan, China
Phoebe minutiflora	MW367223	Phoebe	Lauraceae	Yunnan, China
Litsea pungens	NC_050368	Litsea	Lauraceae	-
Sinopora hongkongensis	NC_051914	Sinopora	Lauraceae	-
