# Supplementary material for: Comparative chloroplast genome analyses of diverse Phoebe (Lauraceae) species endemic to China provide insight into their phylogeographical origin
Source: PeerJ. 2023 Feb 3;11:e14573. doi: 10.7717/peerj.14573 (PMC9901306; doi:10.7717/peerj.14573)
Supplement: Supplemental Information 2 [file peerj-11-14573-s002.xls]

## Sheet: Statistics
SSR		Phoebe hunanensis	Phoebe tavoyana	Phoebe bournei	Phoebe chekiangensis	Phoebe neurantha	Phoebe omeiensis	Phoebe puwenensis	Phoebe sheareri	Phoebe zhennan	Percentage
Mono	A/T	90	89	89	87	88	90	90	88	90	0.43408
	C/G	4	4	4	3	3	4	4	2	4
Di	AC/GT	2	2	2	2	2	2	2	2	2	0.175091
	AG/CT	16	16	16	15	16	16	16	16	16
	AT/AT	19	19	19	20	20	19	19	21	19
Tri	AAC/GTT	11	11	11	11	11	11	11	11	11	0.338718
	AAG/CTT	18	18	18	18	18	18	18	18	18
	AAT/ATT	21	21	22	21	21	22	21	21	21
	ACC/GGT	2	2	2	2	2	2	2	2	2
	ACT/AGT	3	3	3	3	3	3	3	3	3
	AGC/CTG	7	7	7	7	7	7	7	7	7
	AGG/CCT	5	5	5	5	5	5	5	5	5
	ATC/ATG	5	5	5	5	5	5	5	5	5
Tetra	AAAG/CTTT	1	1	1	1	1	4	1	1	1	0.0411673
	AAAT/ATTT	4	4	4	4	4	1	4	3	4
	AACT/AGTT	1	1	1	1	1	2	1	1	1
	AATG/ATTC	2	2	2	2	2	1	2	2	2
	ACAT/ATGT	1	1	1	1	1		1	1	1
Penta	AAATC/ATTTG	1	1	1	1	1	1	1	1	1	0.00781657
	AAGGT/ACCTT	1	1	1	-	1	-	1	-	1
Hexa	AAATAG/ATTTCT	1	1	1	-	-	1	1	-	1	0.00312663
	Total	215	214	215	209	212	214	215	210	215	1

## Sheet: types
SSR	Percentage
Mono (43.41%)	0.43408
Di (17.51%)	0.175091
Tri (33.87%)	0.338718
Tetra (4.12%)	0.0411673
Penta (0.78%)	0.00781657
Hexa (0.31%)	0.00312663
