# Supplementary material for: Comparative chloroplast genome analyses of diverse Phoebe (Lauraceae) species endemic to China provide insight into their phylogeographical origin
Source: PeerJ. 2023 Feb 3;11:e14573. doi: 10.7717/peerj.14573 (PMC9901306; doi:10.7717/peerj.14573)
Supplement: Supplemental Information 3 [file peerj-11-14573-s003.xlsx]

## Sheet: types
	Phoebe hunanensis	Phoebe tavoyana	Phoebe bournei	Phoebe chekiangensis	Phoebe neurantha	Phoebe omeiensis	Phoebe puwenensis	Phoebe sheareri	Phoebe zhennan
F	12	14	15	14	13	11	9	13	14
P	14	13	16	16	12	15	14	16	15
R	6	7	6	5	6	5	5	6	5
C	0	1	1	0	0	0	1	0	0
Total	32	35	38	35	31	31	29	35	34

## Sheet: region
	Phoebe hunanensis	Phoebe tavoyana	Phoebe bournei	Phoebe chekiangensis	Phoebe neurantha	Phoebe omeiensis	Phoebe puwenensis	Phoebe sheareri	Phoebe zhennan
LSC	20	21	26	22	17	19	18	22	22
IR	8	8	8	9	8	8	8	9	8
SSC	4	6	4	4	6	4	3	4	4

## Sheet: lengths
	Phoebe hunanensis	Phoebe tavoyana	Phoebe bournei	Phoebe chekiangensis	Phoebe neurantha	Phoebe omeiensis	Phoebe puwenensis	Phoebe sheareri	Phoebe zhennan
20	7	9	10	8	10	5	6	7	9
21	8	8	10	6	6	9	7	7	8
22	2	2	3	4	2	2	3	2	2
23	1	1	1	2	1	1	2	2	1
25	2	3	2	3	3	1	1	2	2
26	2	3	2	2	2	2	2	2	2
27	2	0	1	1	0	0	0	1	1
28	1	1	1	0	1	1	1	1	1
29	0	1	0	0	1	1	1	0	0
30	1	0	1	1	0	1	1	2	1
33	4	4	4	4	4	4	4	4	4
35	1	0	1	1	0	2	0	1	1
>35	1	3	2	2	1	2	1	4	2
