# Supplementary material for: Comparative chloroplast genome analyses of diverse Phoebe (Lauraceae) species endemic to China provide insight into their phylogeographical origin
Source: PeerJ. 2023 Feb 3;11:e14573. doi: 10.7717/peerj.14573 (PMC9901306; doi:10.7717/peerj.14573)
Supplement: Supplemental Information 4 [file peerj-11-14573-s004.xlsx]

## Sheet: Sheet1
P. hun	AA	Freq	RSCU
GCU	A (Ala)	430	1.23
GCC	A (Ala)	351	1
GCA	A (Ala)	386	1.1
GCG	A (Ala)	236	0.67
UGU	C (Cys)	656	1.21
UGC	C (Cys)	427	0.79
GAU	D (Asp)	1050	1.4
GAC	D (Asp)	448	0.6
GAA	E (Glu)	1268	1.32
GAG	E (Glu)	651	0.68
UUU	F (Phe)	1940	1.13
UUC	F (Phe)	1502	0.87
GGU	G (Gly)	521	0.92
GGC	G (Gly)	332	0.58
GGA	G (Gly)	818	1.44
GGG	G (Gly)	602	1.06
CAU	H (His)	1003	1.38
CAC	H (His)	454	0.62
AUU	I (He)	1615	1.16
AUC	I (He)	1172	0.84
AUA	I (He)	1383	0.99
AAA	K (Lys)	1737	1.26
AAG	K (Lys)	1018	0.74
UUA	L (Leu)	851	0.97
UUG	L (Leu)	1150	1.32
CUU	L (Leu)	1074	1.23
CUC	L (Leu)	764	0.87
CUA	L (Leu)	811	0.93
CUG	L (Leu)	592	0.68
AUG	M (Met)	971	1
AAU	W (Trp)	1619	1.35
AAC	N (Asn)	782	0.65
CCU	N (Asn)	660	1.03
CCC	P (Pro)	636	0.99
CCA	P (Pro)	822	1.28
CCG	P (Pro)	457	0.71
CAA	P (Pro)	1094	1.35
CAG	Q (Gin)	525	0.65
CGU	Q (Gin)	377	0.69
CGC	R (Arg)	251	0.46
CGA	R (Arg)	586	1.07
CGG	R (Arg)	438	0.8
AGA	R (Arg)	1009	1.84
AGG	R (Arg)	632	1.15
UCU	R (Arg)	996	1.31
UCC	S (Ser)	908	1.19
UCA	S (Ser)	902	1.18
UCG	S (Ser)	641	0.84
AGU	S (Ser)	635	0.83
AGC	S (Ser)	486	0.64
ACU	S (Ser)	594	1.06
ACC	T (Thr)	562	1
ACA	T (Thr)	668	1.19
ACG	T (Thr)	418	0.75
GUU	T (Thr)	765	1.29
GUC	V (Val)	473	0.8
GUA	V (Val)	651	1.1
GUG	V (Val)	481	0.81
UGG	V (Val)	740	1
UAU	Y (Tyr)	1361	1.32
UAC	Y (Tyr)	699	0.68
UAA	*	1023	1.08
UAG	*	845	0.89
UGA	*	981	1.03

## Sheet: Sheet2
AA	P. hun	Frequency	Count	RSCU
A	GCU	0.306486	430	1.23
	GCC	0.250178	351	1
	GCA	0.275125	386	1.1
	GCG	0.168211	236	0.67
C	UGU	0.605725	656	1.21
	UGC	0.394275	427	0.79
D	GAU	0.700935	1050	1.4
	GAC	0.299065	448	0.6
E	GAA	0.660761	1268	1.32
	GAG	0.339239	651	0.68
F	UUU	0.563626	1940	1.13
	UUC	0.436374	1502	0.87
G	GGU	0.229212	521	0.92
	GGC	0.146062	332	0.58
	GGA	0.359877	818	1.44
	GGG	0.264848	602	1.06
H	CAU	0.688401	1003	1.38
	CAC	0.311599	454	0.62
I	AUU	0.38729	1615	1.16
	AUC	0.281055	1172	0.84
	AUA	0.331655	1383	0.99
K	AAA	0.63049	1737	1.26
	AAG	0.544676	1018	0.74
L	UUA	0.162343	851	0.97
	UUG	0.219382	1150	1.32
	CUU	0.204884	1074	1.23
	CUC	0.145746	764	0.87
	CUA	0.154712	811	0.93
	CUG	0.112934	592	0.68
M	AUG	1	971	1
N	AAU	0.674302	1619	1.35
	AAC	0.325698	782	0.65
P	CCU	0.256311	660	1.03
	CCC	0.24699	636	0.99
	CCA	0.319223	822	1.28
	CCG	0.177476	457	0.71
Q	CAA	0.675726	1094	1.35
	CAG	0.324274	525	0.65
R	CGU	0.114485	377	0.69
	CGC	0.0762223	251	0.46
	CGA	0.177953	586	1.07
	CGG	0.133009	438	0.8
	AGA	0.306408	1009	1.84
	AGG	0.191922	632	1.15
S	UCU	0.218039	996	1.31
	UCC	0.198774	908	1.19
	UCA	0.197461	902	1.18
	UCG	0.140324	641	0.84
	AGU	0.139011	635	0.83
	AGC	0.106392	486	0.64
T	ACU	0.264942	594	1.06
	ACC	0.250669	562	1
	ACA	0.297948	668	1.19
	ACG	0.186441	418	0.75
V	GUU	0.322785	765	1.29
	GUC	0.199578	473	0.8
	GUA	0.274684	651	1.1
	GUG	0.202954	481	0.81
W	UGG	1	740	1
Y	UAU	0.66068	1361	1.32
	UAC	0.33932	699	0.68
*	UAA	0.359073	1023	1.08
	UAG	0.296595	845	0.89
	UGA	0.344331	981	1.03
