# Supplementary material for: Comparative chloroplast genome analyses of diverse Phoebe (Lauraceae) species endemic to China provide insight into their phylogeographical origin
Source: PeerJ. 2023 Feb 3;11:e14573. doi: 10.7717/peerj.14573 (PMC9901306; doi:10.7717/peerj.14573)
Supplement: Supplemental Information 5 [file peerj-11-14573-s005.xlsx]

## Sheet: Sheet1
Gene	Phoebe hunanensis	Phoebe tavoyana	Phoebe bournei	Phoebe chekiangensis	Phoebe omeiensis	Phoebe puwenensis	Phoebe sheareri	Phoebe zhennan
accD	0	0	0	0	0	0	0	0
atpA	0	0	0	0	0	0	0	0
atpB	0	0.111565	0	0	0.240133	0	0.240133	0
atpE	0	0	0	0	0	0	0	0
atpF	0	0	0	0	0	0	0	0
atpH	0	0	0	0	0	0	0	0
atpI	0	0	0	0	0	0	0	0
ccsA	0	0	0	0	0	0	0	0
cemA	0	0.197816	0.197816	0	0.197816	0	0.197816	0
clpP	0	0	0	0	0	0	0	0
infA	0	0	0	0	0	0	0	0
matK	0.298011	0.185728	0.185728	0.299067	0.185728	0.299067	0.185728	0.185092
ndhA	0	0	0	0	0	0	0	0.0856603
ndhB	0	0	0	0	0	0	0	0
ndhC	0	0	0	0	0	0	0	0
ndhD	0	0	0.144428	0.144428	0.124856	0.144428	0.124856	0.236542
ndhE	0	0.221268	0.221268	0.221268	0.221268	0.221268	0.221268	0
ndhF	0	0.169345	0.169345	0.169345	0.169345	0.169345	0.169345	0.296081
ndhG	0	0	0	0	0	0	0	0
ndhH	0.0701717	0.134348	0.105918	0.134348	0.105918	0.134348	0.105918	0.105918
ndhI	0	0	0	0	0	0	0	0
ndhJ	0	0	0	0	0	0	0	0
ndhK	0	0	0	0	0	0	0	0
petA	0.656552	0	0	0	0	0	0	0
petB	0	0	0	0	0	0	0	0
petD	0	0	0	0.336103	0	0.336103	0	0
petG	0	0	0	0	0	0	0	0
petL	0	0	0	0	0	0	0	0
petN	0	0	0	0	0	0	0	0
psaA	0	0	0	0	0	0	0	0
psaB	0	0	0	0	0.304142	0	0.304142	0
psaC	0	0	0	0	0	0	0	0
psaI	0	0	0	0	0	0	0	0
psaJ	0	0	0	0	0	0	0	0
psbA	0	0	0	0	0	0	0	0
psbB	0	0	0.0352464	0	0	0	0	0
psbC	0	0	0	0	0	0	0	0
psbD	0	0	0	0	0	0	0	0
psbE	0	0	0	0	0	0	0	0
psbF	0	0	0	0	0	0	0	0
psbH	0	0	0	0	0	0	0	0
psbI	0	0	0	0	0	0	0	0
psbJ	0	0	0	0	0	0	0	0
psbK	0	0	0	0	0	0	0	0
psbL	0	0	0	0	0	0	0	0
psbM	0	0	0	0	0	0	0	0
psbN	0	0	0	0	0	0	0	0
psbT	0	0	0	0	0	0	0	0
psbZ	0	0	0	0	0	0	0	0
rbcL	0	0	0	0	0	0	0	0
rpl14	0	0	0	0	0	0	0	0
rpl16	0	1.39742	0	0	0	0	0	0
rpl2	0	0	0	0	0	0	0	0
rpl20	0	0	0	0	0	0	0	0
rpl22	0	0	0	0	0	0	0	0
rpl23	0	0	0	0	0	0	0	0
rpl32	0.241242	0	0	0	0	0	0	0
rpl33	0	0	0	0	0	0	0	0
rpl36	0	0	0	0	0	0	0	0
rpoA	0	0.102727	0.206076	0	0.206076	0	0.206076	0
rpoB	0.112794	0.172552	0.154557	0.226178	0.172706	0.226178	0.172706	0.309539
rpoC1	0	0	0	0	0	0	0	0
rpoC2	0	0	0	0	0	0	0	0.754541
rps11	0	0	0	0	0	0	0	0
rps12	0	0	0.272854	0.272854	0.272854	0.272854	0.272854	0.272854
rps14	0	0	0	0	0	0	0	0
rps15	0	0	0	0	0	0	0	0
rps16	0	0	0	0	0	0	0	0
rps18	0	0	0	0	0	0	0	0
rps19	0	0	0	0	0	0	0	0
rps2	0	0.214361	0.214361	0	0.214361	0	0.214361	0
rps3	0	0	0	0	0	0	0	0
rps4	0	0	0	0	0	0	0	0
rps7	0	0	0	0	0	0	0	0
rps8	0	0	0	0	0	0	0	0
ycf1	0.704109	0.709401	0.708618	0.709401	0.710339	0.709401	0.710339	0.708649
ycf2	0	0.882832	0.928149	0	0.923905	0	0.923905	1.20482
ycf3	0	0	0	0	0	0	0	0
ycf4	0	0	0	0	0	0	0	0
