# Supplementary material for: Comparative chloroplast genome analyses of diverse Phoebe (Lauraceae) species endemic to China provide insight into their phylogeographical origin
Source: PeerJ. 2023 Feb 3;11:e14573. doi: 10.7717/peerj.14573 (PMC9901306; doi:10.7717/peerj.14573)
Supplement: Supplemental Information 6 [file peerj-11-14573-s006.xlsx]

## Sheet: Sheet1
Comparative analyses of InDel sites
Species	Large single copy		Inverted repeat		Small single copy
	No's of InDels	InDels' average length	No's of InDels	InDels' average length	No's of InDels	InDels' average length
Phoebe hunanensis	59	2.19 (bp)	0	0 (bp)	12	1.25 (bp)
Phoebe tavoyana	28	1.46 (bp)	0	0 (bp)	11	1.36 (bp)
Phoebe bournei	58	2.05 (bp)	0	0 (bp)	11	1.27 (bp)
Phoebe chekiangensis	59	1.97 (bp)	0	0 (bp)	10	1.50 (bp)
Phoebe omeiensis	29	0.68 (bp)	0	0 (bp)	12	1.17 (bp)
Phoebe puwenensis	44	2.39 (bp)	2	0 (bp)	6	1.33 (bp)
Phoebe sheareri	59	1.95 (bp)	0	0 (bp)	11	0.92 (bp)
Phoebe zhennan	59	2.03 (bp)	0	0 (bp)	11	1.27 (bp)
Average	49.375	1.84 (bp)	0.25	0 (bp)	10.5	1.26 (bp)
