# Supplementary material for: Comparative chloroplast genome analyses of diverse Phoebe (Lauraceae) species endemic to China provide insight into their phylogeographical origin
Source: PeerJ. 2023 Feb 3;11:e14573. doi: 10.7717/peerj.14573 (PMC9901306; doi:10.7717/peerj.14573)
Supplement: Supplemental Information 7 [file peerj-11-14573-s007.xlsx]

## Sheet: Sheet1
Node	Method	Proportion of ancestral distribution
		A	B	C	AB	AC	BC	ABC	D	AD	*
32	S-DIVA	-	-	0.3333	-	0.3333	-	0.3333	-	-	0.0001
	BBM	0.2013	0.1254	0.2254	0.1051	0.1688	0.0939	0.0787	-	-	0.0014
34	S-DIVA	-	-	-	0.3333	0.3333	0.3333	-	-	-	0.0001
	BBM	0.2449	0.1686	0.1426	0.1496	0.1266	0.0871	0.0773	-	-	0.0033
38	S-DIVA	-	-	-	1	-	-	-	-	-	-
	BBM	0.497	0.0856	-	0.4044	-	-	-	-	-	0.013
39	S-DIVA	1	-	-	-	-	-	-	-	-	-
	BBM	0.4128	-	-	0.4602	0.0527	-	0.0588	-	-	0.0155
41	S-DIVA	-	-	0.3333	-	0.3333	-	0.3333	-	-	0.0001
	BBM	0.8061	-	-	0.1412	-	-	-	-	-	0.0527
42	S-DIVA	0.5	-	-	-	0.5	-	-	-	-	-
	BBM	0.7997	-	-	0.1096	0.0609	-	-	-	-	0.0298
